# Supplementary material
Source: PubMed Central journal article supplement (PMC6996708)
Supplement: ry190018suppa1.pdf [file ry190018suppa1.pdf]

**Table E1. Quarterly lens dose equivalent and effective dose equivalent values between the one-and two-badge protocols. All values are reported in units of mSv.**

| Year                                                  | Badge protocol | Quarterly entries | $H_p(3)$ |           |           | Effective dose equivalent, $H_E$ |           |           |
|-------------------------------------------------------|----------------|-------------------|----------|-----------|-----------|----------------------------------|-----------|-----------|
|                                                       |                |                   | Median   | IQR       | 95th Pctl | Median                           | IQR       | 95th Pctl |
| 2009                                                  | One-badge      | 7,932             | 0.29     | 0.11–0.74 | 3.30      | 0.09                             | 0.03–0.22 | 0.99      |
| 2012                                                  | One-badge      | 17,214            | 0.20     | 0.07–0.62 | 3.45      | 0.06                             | 0.02–0.19 | 1.03      |
| 2015                                                  | One-badge      | 17,213            | 0.18     | 0.07–0.67 | 3.34      | 0.05                             | 0.02–0.20 | 1.00      |
| All years                                             | One-badge      | 42,359            | 0.21     | 0.08–0.67 | 3.38      | 0.06                             | 0.02–0.20 | 1.00      |
| Under-apron badge is below the lower LOD <sup>a</sup> |                |                   |          |           |           |                                  |           |           |
| 2009                                                  | Two-badge      | 638               | 0.40     | 0.20–0.82 | 1.63      | 0.02                             | 0.01–0.03 | 0.07      |
| 2012                                                  | Two-badge      | 753               | 0.34     | 0.14–0.81 | 1.56      | 0.01                             | 0.01–0.03 | 0.06      |
| 2015                                                  | Two-badge      | 994               | 0.36     | 0.15–0.77 | 1.57      | 0.01                             | 0.01–0.03 | 0.06      |
| All years                                             | Two-badge      | 2,385             | 0.37     | 0.15–0.80 | 1.59      | 0.01                             | 0.01–0.03 | 0.06      |
| Under-apron badge is above the lower LOD              |                |                   |          |           |           |                                  |           |           |
| 2009                                                  | Two-badge      | 353               | 1.87     | 0.89–3.91 | 10.8      | 0.30                             | 0.16–0.56 | 1.47      |
| 2012                                                  | Two-badge      | 629               | 1.72     | 0.79–3.79 | 10.4      | 0.24                             | 0.13–0.48 | 2.07      |
| 2015                                                  | Two-badge      | 833               | 1.86     | 0.93–4.07 | 13.9      | 0.24                             | 0.13–0.57 | 1.94      |
| All years                                             | Two-badge      | 1,815             | 1.84     | 0.87–3.95 | 11.8      | 0.25                             | 0.14–0.52 | 1.83      |

<sup>a</sup>The lower limit of detection (LOD) is 0.02 mSv.

IQR, interquartile range; LOD, limit of detection; Pctl, percentile.

**Table E2. Annual lens dose equivalent and effective dose equivalent values between the one-and two-badge protocols for individuals monitored on a quarterly exchange with complete year dosimetry. All values are reported in units of mSv.**

| Year                                                                              | Badge protocol | Persons | $H_p(3)$ |           |           | Effective dose equivalent, $H_E$ |           |           |
|-----------------------------------------------------------------------------------|----------------|---------|----------|-----------|-----------|----------------------------------|-----------|-----------|
|                                                                                   |                |         | Median   | IQR       | 95th Pctl | Median                           | IQR       | 95th Pctl |
| 2009                                                                              | One-badge      | 1,143   | 2.14     | 0.89–5.08 | 19.0      | 0.64                             | 0.27–1.52 | 5.71      |
| 2012                                                                              | One-badge      | 2,382   | 1.80     | 0.71–4.55 | 19.8      | 0.54                             | 0.21–1.36 | 5.92      |
| 2015                                                                              | One-badge      | 2,604   | 1.67     | 0.58–4.37 | 17.3      | 0.50                             | 0.17–1.31 | 5.17      |
| All years                                                                         | One-badge      | 4,679   | 1.68     | 0.65–4.27 | 17.4      | 0.50                             | 0.20–1.28 | 5.18      |
| 2009                                                                              | Two-badge      | 111     | 3.10     | 1.83–6.06 | 28.9      | 0.23                             | 0.09–0.79 | 3.37      |
| 2012                                                                              | Two-badge      | 174     | 3.87     | 1.67–8.44 | 35.3      | 0.34                             | 0.11–1.09 | 4.71      |
| 2015                                                                              | Two-badge      | 226     | 3.82     | 1.95–7.62 | 34.5      | 0.32                             | 0.11–0.92 | 5.30      |
| All years                                                                         | Two-badge      | 427     | 3.62     | 1.83–7.08 | 30.5      | 0.27                             | 0.10–0.93 | 4.32      |
| Under-apron badge is consistently (9+ months/yr) above the lower LOD <sup>a</sup> |                |         |          |           |           |                                  |           |           |
| 2009                                                                              | Two-badge      | 29      | 10.62    | 6.55–21.2 | 65.7      | 1.61                             | 0.92–2.83 | 5.43      |
| 2012                                                                              | Two-badge      | 81      | 8.52     | 4.12–20.3 | 60.3      | 1.10                             | 0.70–2.12 | 10.1      |
| 2015                                                                              | Two-badge      | 97      | 9.00     | 4.83–16.9 | 66.6      | 1.04                             | 0.57–2.55 | 6.93      |
| All years                                                                         | Two-badge      | 174     | 8.50     | 4.78–16.8 | 58.3      | 1.12                             | 0.69–2.16 | 6.42      |

<sup>a</sup>See Code of Federal Regulation 10 C.F.R. § 20.1201 (19).

<sup>b</sup>Guidance issued by the National Council on Radiation Protection (27).

<sup>c</sup>Recommendations by the International Commission on Radiological Protection (26).

<sup>d</sup>See footnote a.

<sup>e</sup>The lower LOD is 0.02 mSv.

IQR, interquartile range; LOD, limit of detection; Pctl, percentile.

**Table E3. Number of annual doses for workers monitored on a quarterly exchange exceeding regulatory limits as well as suggested limits by scientific advisory bodies.**

|                           | Protocol  |           |
|---------------------------|-----------|-----------|
|                           | One-badge | Two-badge |
| Person-years              | 6,129     | 511       |
| Lens dose equivalent:     |           |           |
| >150 <sup>a</sup> mSv     | 1         | 0         |
| > 50 <sup>b</sup> mSv     | 40        | 14        |
| > 20 <sup>c</sup> mSv     | 278       | 50        |
| Effective dose equivalent |           |           |
| > 50 <sup>a</sup> mSv     | 1         | 0         |

<sup>a</sup>See Code of Federal Regulation 10 C.F.R. § 20.1201 (19).

<sup>b</sup>Guidance issued by the National Council on Radiation Protection (27).

<sup>c</sup>Recommendations by the International Commission on Radiological Protection (26).

<sup>d</sup>See footnote a.
